# Supplementary material for: Quantification of the Host Response Proteome after Mammalian Reovirus T1L Infection
Source: PLoS One. 2012 Dec 11;7(12):e51939. doi: 10.1371/journal.pone.0051939 (PMC3519901; doi:10.1371/journal.pone.0051939)
Supplement: Table S1 — Table showing all host proteins observed as up-regulated (at 95% confidence) after infection with T1L reovirus at both 6 and 24 hpi. Proteins at the top of the lists are those identified more than one time; proteins in the bottom half are those identified only once. Table shows the individual protein z-scores found for each of the three biological replicates, as well as the average L:H ratios for all three experiments. A protein is included in this table if at least half of the biologic z-score values are ≥1.960σ (indicated by bolding; at least 95% confidence score) and there are no major disagreements between biological replicates. (XLS) [file pone.0051939.s003.xls]

## Sheet: Supplementary Table S1
Supplementary Table S1. HEK293 proteins increased >95% confidencea
Accession	HGNC	Name	6 hpi				24hpi
			z-score			L:H ratiob	z-score			L:H ratiob
			Expt 1	Expt 2	Expt 3		Expt 1	Expt 2	Expt 3
Proteins measured in >1 experiment (at a single time point)
34416	LTF	Lactotransferrin	6.8892			8.87823	7.71694	4.33366	7.08077	8.72224
6013427	ALBU	serum albumin precursor			9.2222	5.85253	3.34832	7.57919	3.49367	5.02273
17318569	K2C1	keratin 1	4.67535	5.13002		4.79644	9.11958			38.3468
1683637	BAD	Bcl-2 binding component 6	3.12888	4.6751		3.49727	-0.773406			0.760856
25058739	ALB	ALB protein	3.323	3.51663		3.00482
9963783	Q9HBZ9	RNA helicase	5.24759	0.941977		2.71493	4.08488	0.543886		2.51107
4557325	APOE	apolipoprotein E precursor	4.51418	1.59142		2.67833	4.63289			6.48098
6563288	UBQL2	ubiquitin-like product Chap1/Dsk2	0.473391	5.62343		2.66951	0.304653	-0.310904	-0.26374	1.00227
16553095	ASPC1	unnamed protein product	0.723646	4.68144		2.39429	2.13307			2.40691
56204388	MEA1	male-enhanced antigen	5.25932	-0.211083		2.26834	0.095437	-1.04689		0.877293
20336350	HCD2	endoplasmic reticulum-associated amyloid beta peptide-binding protein	2.50827			2.22491	2.68661	0.406701		1.86108
4885217	XPF	excision repair cross-complementing rodent repair deficiency, complementation group 4		2.21158		2.07995
55959029	UBE2T	ubiquitin conjugating enzyme	0.0925666	4.2556		2.02659	0.347015			1.18607
22671717	HBA2	hemoglobin alpha-2	0.355078	3.95881		2.01593	3.3381	3.60401		3.57975
55660909	SC23B	Sec23 homolog B (S. cerevisiae)	0.502743	3.76656		2.00197	0.392382			1.20758
29792115	SMAD3	SMAD, mothers against DPP homolog 3 (Drosophila)	0.960504	3.26892		1.98987	1.67591			2.00813
48734878	Q6IPH7	RPL14 protein	2.4252	3.45409	0.685218	1.9682	1.00031	1.48012	3.28027	1.8524
7020506	UB2R2	unnamed protein product	0.284976	3.86153		1.96343	0.115473			1.08209
4505571	SQSTM	sequestosome 1	0.178004	3.56214		1.84163	0.753988			1.39362
57208697	REPS1	RALBP1 associated Eps domain containing 1	3.56044	-0.0652753		1.77478	1.26117			1.70381
14042287	NRBP	unnamed protein product	0.0269633	3.36313		1.74274	-0.0370717			1.01862
4589628	PALLD	KIAA0992 protein	0.352273	2.9896		1.72982
55962212	CTBP2	C-terminal binding protein 2	1.32037	1.97543		1.7181	-0.929367			0.71526
55749758	DIP2B	DIP2 disco-interacting protein 2 homolog B	0.39386	2.60839		1.63977	0.695917			1.36191
5803123	PSMF1	proteasome inhibitor subunit 1 isoform 1	0.584134	3.93614	0.065014	1.6394	0.304765	2.21404		1.56216
21961219	DNJB4	DnaJ (Hsp40) homolog, subfamily B, member 4	0.318586	2.67884		1.63847	-0.401053			0.881817
12654999	DPOA2	Polymerase (DNA directed), alpha 2 (70kD subunit)	-0.401504	3.38559		1.63447	-1.54541	1.35198		0.939833
13543689	SLD5	GINS complex subunit 4 (Sld5 homolog)	0.635188	2.22959		1.60484
793843	RL29	ribosomal protein L29	1.99476	0.731565		1.57124	1.39586	1.32179		1.67483
3970842	AL1A2	RALDH2	0.585143	2.12598		1.56644	0.700347			1.36431
56202415	STX12	syntaxin 12	2.21405	0.383175		1.53978			0.550155	1.18385
28336	ACTB	mutant beta-actin (beta'-actin)	0.639949		3.3279	1.52895	-0.490601	1.82782	2.43238	1.46166
56205198	SNAPN	SNAP-associated protein	-0.489834	3.04791		1.52836	-0.0597221			1.00952
55962100	B1AN89	eukaryotic translation initiation factor 4 gamma, 3	0.299713	2.16908		1.50758	-0.247696			0.937063
13477351	CP080	Gene trap locus 3 (mouse)	0.282879	2.16811		1.50335	-0.205246			0.952958
54696534	ATPO	ATP synthase, H+ transporting, mitochondrial F1 complex, O subunit (oligomycin sensitivity conferring protein)	4.09288	-0.462633	0.120228	1.50009		0.78412	2.32437	1.58991
7705411	YTHDF2	YTH domain family, member 2	-0.121233		4.20379	1.47419	-0.593154	0.158583	0.356596	0.992221
9623363	DPOE3	DNA polymerase epsilon p17 subunit	-0.111584	2.39346		1.46357
55962775	S10AD	S100 calcium binding protein A13	2.20355	-0.310131		1.37824	0.663011			1.34427
7672784	HSP7E	heat shock protein HSP60	-0.183828	2.05908		1.37275	0.24709	2.97287		1.74937
7576229	VIME	vimentin	2.08845		-0.391736	1.34673	0.486529	-0.806084		0.986211
21749793	Q8NB80	unnamed protein product		-0.443691	3.37821	1.31346		-0.633283		0.82124
7705431	CCD72	coiled-coil domain containing 72		-0.00165618	2.54751	1.30062
48146451	DBNL	HIP-55		0.193778	2.13969	1.28997		0.120844	0.95037	1.17942
21750170	Q8NB11	unnamed protein product	1.96769	-0.543654		1.2799	1.31079		-0.201661	1.29283
55663125	SET	SET nuclear oncogene		0.0625022	2.13957	1.26356		-0.194061		0.948682
9966827	PCNP	PEST-containing nuclear protein	-0.949859	2.02081		1.20901		4.18213	-0.357357	1.91821
6633995	SK2L2	KIAA0052 protein	-0.875237	1.65923		1.15563	-0.194878	4.69093		2.12513
6274552	STAT1	signal transducer and activator of transcription 1 isoform alpha	1.31491	0.9382		1.1107	2.1572	1.64701	4.13583	2.37812
56203909	DDI2	DNA-damage inducible protein 2 (DDI2)	0.242278			1.08754	3.32674	-0.227899		1.90364
862457	ECHA	enoyl-CoA hydratase/3-hydroxyacyl-CoA dehydrogenase alpha-subunit of trifunctional protein		0.0096107		1.03962	2.37761	0.602916		1.80789
34532659	Q6ZTT1	unnamed protein product	0.298112	-0.742703	0.890667	1.02599	-0.265044		2.92245	1.45649
5738608	NFU1	HIRA-interacting protein HIRIP5		-0.101896		1.00374	2.04932	0.427848		1.64604
3287825	DC1L2	Cytoplasmic dynein 1 light intermediate chain 2 (Dynein light intermediate chain 2, cytosolic) (LIC53/55) (LIC-2)		-0.358106		0.925932	-0.0575734	2.64566		1.56074
31652283	ACO13	thioesterase superfamily member 2		-0.570957		0.865897	2.53372	-0.157785		1.6457
31880783	PELO	pelota homolog	-1.10575		-0.929614	0.772396	-0.476253		2.95124	1.40236
18490917	SCG2	Secretogranin II (chromogranin C)					4.85685	6.37		7.61726
4731861	OAS3	2'-5'oligoadenylate synthetase 3					3.39173	6.10601		5.45643
14550514	ISG15	ISG15 ubiquitin-like modifier					4.91327	4.22982	3.47649	4.27337
34192824	IFIT2	Interferon-induced protein with tetratricopeptide repeats 2					3.5512		3.93719	3.56876
2653424	SHIP2	inositol polyphosphate 5-phosphatase					1.34415	3.67298		2.43898
49574526	IFIT1	interferon-induced protein with tetratricopeptide repeats 1					0.606247		4.69878	2.21207
47123412	Q6NSF2	RPLP0 protein						3.38046	0.576062	1.91292
51476787	Q68D64	hypothetical protein						0.315728	2.21204	1.44954
51476787	Q68D64	hypothetical protein						0.315728	2.21204	1.44954
Proteins measured in only one experiment (at a single time point)
35825	PZP	pregnancy zone protein	9.21096			18.4861	1.08203			1.58706
7161776	K2C75	cytokeratin		7.96074		12.7175
9910266	KIF15	kinesin family member 15	6.71343			8.39871
20809886	Q8N6N5	Tubulin, beta 2C	6.53898			7.94841
9910242	CCDC47	coiled-coil domain containing 47		6.13781		7.16256
18418633	HBB	mutant beta-globin	6.0566			6.82501
579676	AMBP	alpha-1-microglobulin; bikunin		5.87509		6.59378
6425032	Q9UBV6	beta-globin		5.50262		5.86394
18088164	ZN503	ZNF503 protein	5.51512			5.75199
56417672	FA5	coagulation factor V (proaccelerin, labile factor)		5.4352		5.74074
55958670	UBQL1	ubiquilin 1		5.27417		5.45685	0.524799			1.27263
12804349	F203A	Chromosome 8 open reading frame 30A	5.2723			5.32729	0.476308	-1.16384		0.928057
12803651	TMOD1	Tropomodulin 1	5.15422			5.13224	3.5028			4.14162
7662238	ACINU	apoptotic chromatin condensation inducer 1	5.1236			5.08284	1.86704			2.16611
4186185	VIPAR	VPS33B-interacting protein	5.12203			5.08033	3.70279			4.48318
6714707	WDR5	WD repeat-containing protein 5	4.81628			4.6126
50949334	CS025	UPF0449 protein C19orf25	4.68833			4.42988
433308	CAZA2	capping protein alpha	4.60176			4.31038	1.33756		-0.167025	1.30594
52545651	UBP10	hypothetical protein		4.39334		4.1349	0.125694	-0.0839157	0.793287	1.10604
55958063	Q5T985	inter-alpha (globulin) inhibitor, H2 polypeptide		4.26072		3.96576
51491229	DLG2	hypothetical protein		4.19587		3.88558
47938109	Q6IQ37	DCTN1 protein	4.02382			3.59111	0.811224			1.42558
38648811	OSBP1	OSBP protein	3.99943			3.56355	0.0552159			1.05656
13937895	LSM3	LSM3 homolog, U6 small nuclear RNA associated (S. cerevisiae)		3.86891		3.50538	-0.0932282	0.269322		1.04902
33188449	SRPK2	SFRS protein kinase 2 isoform a	3.92319			3.47876
57209890	REPS2	RALBP1 associated Eps domain containing 2			6.38653	3.40269
32450708	NJMU	Chromosome 17 open reading frame 75	3.83377			3.38187	1.56094			1.9187
55664564	MKI67	antigen identified by monoclonal antibody Ki-67		3.59296		3.2136
30851190	CO6A1	Collagen, type VI, alpha 1		3.59217		3.21281	1.85125			2.15261
50370288	FA21A	LOC387680 protein		3.52696		3.1475
7022576	INT7	unnamed protein product		3.49774		3.11867
49119617	Q6NSG7	High-mobility group nucleosome binding domain 1	3.5512			3.09308
20521750	ZC3H4	KIAA1064 protein	3.51782			3.06064	-0.0610373			1.009
6164624	FBX7	F-box protein Fbx7		3.39573		3.02006
55957287	SMAD9	MAD, mothers against decapentaplegic homolog 9 (Drosophila)			5.56379	2.90729		0.345851		1.13275
14329514	GLRX3	thioredoxin-like 3	3.3397			2.89318
48145699	Q6IBL2	OS-9		3.19973		2.83928
12232469	RMD5A	required for meiotic nuclear division 5 homolog A	3.26928			2.82953
56611149	FA21A	Similar to KIAA0592 protein	3.20388			2.77168
20380436	Q6FGR6	Polymerase (RNA) II (DNA directed) polypeptide C, 33kDa	3.19314			2.76229
903682	Q53ZR1	bumetanide-sensitive Na-K-Cl cotransporter	3.19291			2.76209
4886449	R3HC1	hypothetical protein	3.11035			2.69099	-1.03552			0.6858
7662260	KBTBB	kelch repeat and BTB (POZ) domain containing 11	3.06497			2.65269
38303981	Q2TU73	1-acylglycerol-3-phosphate O-acyltransferase 6 (lysophosphatidic acid acyltransferase, zeta)		2.97562		2.64579
57999533	Q5H9Q2	hypothetical protein	3.00757			2.60502	0.408692			1.21541
6503002	DDX20	DEAD box RNA helicase Gemin3		2.83893		2.53431
56204591	IMA5	KPNA5		2.71731		2.43907
57208456	TRMT11	tRNA methyltransferase 11 homolog	2.79359			2.43476
5031717	C43BP	alpha 3 type IV collagen binding protein isoform 1		2.69638		2.42304
7706367	PSF2	DNA replication complex GINS protein PSF2	2.73875			2.39294
54887378	CD041	FLJ12716 protein	2.73066			2.38683
7108340	DHPS	deoxyhypusine synthase isoform c		2.63819		2.37904
16924319	Q8WVW5	Unknown (protein for IMAGE:3538275)		2.6315		2.37403	0.77983			1.40796
52352803	ZNT1	solute carrier family 30 (zinc transporter), member 1		2.59457		2.34658
21740087	TRNT1	hypothetical protein		2.58866		2.34222
7020412	Q9NX98	unnamed protein product		2.57138		2.3295
29792232	TPM1	TPM1 protein	2.63632			2.31676	1.63473			1.97563
37787309	PNCB	nicotinate phosphoribosyltransferase-like protein	2.63593			2.31647	1.1178			1.60972
16418383	NACC1	transcriptional repressor NAC1		2.49676		2.2754	-1.56877			0.55518
31874559	Q7Z345	hypothetical protein		2.47738		2.26155
40788994	TBRG4	KIAA0948 protein		2.47678		2.26113
15278126	PP1R7	PPP1R7 protein	2.55206			2.25591	0.801182			1.41992
7243143	COG1	KIAA1381 protein		2.43882		2.23425	-0.5096			0.844694
5138999	NDUS3	NADH-Ubiquinone reductase		2.41298		2.21615		3.11864		2.81607
57222570	CDAN1	codanin 1	2.47518			2.20178
55962537	KCC1D	calcium\/calmodulin-dependent protein kinase ID	2.47149			2.19922
55249573	CHMP7	CHMP family, member 7		2.33757		2.16413
7717444	OFUT2	human mRNA for KIAA0958 protein	2.38648			2.14095
33636762	ZFYVE19	zinc finger, FYVE domain containing 19	2.35557			2.12014	0.595572			1.30883
32425304	GET4	Chromosome 7 open reading frame 20		2.24289		2.10056	-0.235184			0.941721
27482992	NIPS2	PREDICTED: similar to 60S ribosomal protein L29 (Cell surface heparin binding protein HIP)			3.76778	2.06214			1.68272	1.61859
3309539	LIPB1	liprin-beta1	2.25999			2.05709
6841514	ASF1A	HSPC146	2.24903			2.04998
55741709	RBM25	RNA binding motif protein 25	2.22072			2.03173
46852398	BL1S2	biogenesis of lysosome-related organelles complex-1, subunit 2 isoform 1	2.20364			2.02079
55960950	LYSM1	novel protein (SB145)		2.07701		1.99363
5924008	ENPP4	ENPP4		2.06897		1.98859	1.50986			1.88026
57014047	Q5I6Y4	lamin A/C transcript variant 1	2.14517			1.98381	-0.238795			0.940374
31565806	D9YZV7	Tropomyosin 1 (alpha)		2.03871		1.96973
50592996	TBB3	tubulin, beta, 4	2.11062			1.96228
55956899	K1C9	keratin 9	2.03599			1.91656
3273228	ACADV	very-long-chain acyl-CoA dehydrogenase	1.97804			1.88179	0.850389			1.44788
32187321	HSBP1	NPC-A-13	1.97183			1.87811	2.57624			2.86896
2769254	ADDA	NIPSNAP2 protein			2.79435	1.71186
16359088	Q96B43	Similar to methionyl aminopeptidase 2	1.66983			1.70722	4.69554			6.64387
29826321	BRE	adducin 1 (alpha) isoform b			2.4988	1.61779	0.279409			1.15472
12654817	DHAK	Brain and reproductive organ-expressed (TNFRSF1A modulator)			2.39521	1.58605
10435998	HMGB3	unnamed protein product			2.31924	1.56318
2285963	TACO1	high mobility group protein 2a			2.10652	1.50086
31657231	TTC5	Tetratricopeptide repeat domain 5	1.15137			1.44931	3.103			3.53486
3603418	2AAB	protein phosphatase 2A regulatory subunit A, beta isoform	1.23644	0.66693		1.37977	3.67393			4.4322
55664512	PIN1P1	protein (peptidyl-prolyl cis\/trans isomerase) NIMA-interacting 1-like	0.932598			1.35254	3.56396			4.24321
4759068	SCO1	cytochrome oxidase deficient homolog 1		0.791798		1.33002		7.12213		10.4882
14043517	LYRM7	Coiled-coil domain containing 44			1.47093	1.32908			2.13609	1.83448
47115169	Q6LEU2	ATP1B1		0.787979		1.32842	2.06664			2.34439
49168580	Q6FHZ0	MDH2	1.41874		0.451079	1.31324	2.08617			2.3626
56204494	CA055	novel protein (FLJ35382)	0.704727			1.2586	2.9114			3.27641
55959864	NICA	nicastrin	2.01942	-0.849659		1.2297	2.1535			2.42649
825689	ECI1	dodecenoyl-CoA delta-isomerase	0.992163	-0.177716		1.16222	2.38332			2.65782
5834565	A8K6K3	OTTHUMP00000028508	-0.302722	1.01305		1.14261	2.12982			2.40382
55859554	CDC26	cell division cycle 26	-1.38717	2.04446		1.13253	2.01149			2.29371
28839294	Q86WV7	FLJ31795 protein	0.282291			1.10137	3.1673			3.62606
46411172	MBNL1	muscleblind-like 1 isoform f	0.198827			1.07271	2.35627			2.62948
51100974	MYO1D	myosin ID	-0.41364	0.635963		1.05804	5.20457			8.12865
51451152	Q5S971	cytochrome c oxidase subunit II		0.0243644		1.04446		2.88228		2.60573
6331231	MAVS	KIAA1271 protein	0.808048	-0.843798		1.01649	2.0568			2.33527
386134	PPAC	adipocyte acid phosphatase alpha; HAAP alpha	0.639328	-0.82057		0.993391	2.22852			2.49969
14602986	ACTC	Actin, alpha, cardiac muscle	-0.198205			0.946272	3.65288			4.39539
32699045	PDDC1	hypothetical protein LOC347862		0.0839711	-0.934139	0.944972		2.13967		2.04175
7717310	UBP16	human ubiquitin processing protease, EC 3.1.2.15	-0.550973			0.846487	1.97323			2.2592
20853684	RLA0L	BLOCK 23		-0.702478		0.830763		5.75138		6.68615
34732687	IQGA2	testis specific IQ motif containing GTPase activating protein 2	-0.6161			0.82925	3.96475			4.97354
6466450	COMT	catechol-O-methyltransferase isoform S-COMT	-1.06827			0.718873	2.80179			3.13716
4324472	RM12	5c5-2 protein		-1.432		0.660231	3.66278			4.41266
5902018	TPPP	brain-specific protein p25 alpha	-1.36927			0.653671	2.81304			3.15119
514268	ABL1	proto-oncogene tyrosine-protein kinase	-5.1239			0.199649	3.13642			3.58198
55958476	Q5T765	interferon-induced protein with tetratricopeptide repeats 4							17.9046	142.814
22328092	CO1A1	Collagen, type I, alpha 1					12.1036			125.093
36575	VTNC	unnamed protein product					9.84121			51.04
22902225	UBP46	Ubiquitin specific peptidase 46					8.29209			27.6268
6003532	Q9UK54	hemoglobin beta subunit variant					6.24678			12.2847
1777782	IFIT3	ISG family member					5.62115			9.58747
55665493	PAIRB	PAI-1 mRNA-binding protein (PAI-RBP1)					5.61835			9.57685
55957065	APOL2	OTTHUMP00000028936					4.2195			5.50177
47132620	K22E	keratin 2					4.21309			5.48781
28193112	CCNK	unnamed protein product					4.02098			5.08559
33946299	PRPF39	PRP39 pre-mRNA processing factor 39 homolog (S. cerevisiae)					4.00858			5.06065
7023218	NU133	unnamed protein product					3.90299			4.85329
808869	GOGB1	golgi antigen gcp372					3.71638			4.50738
4680681	SNUT2	CGI-21 protein					3.54596			4.21305
5759309	UBAC1	putative glialblastoma cell differentiation-related protein						4.3368		4.20147
39644662	HS90B	HSP90AB1 protein					3.52964			4.1859
15080568	CENPH	Centromere protein H					3.52033			4.17049
780806	PAK1	p21-activated protein kinase					3.39461			3.96783
21594922	RBM42	MGC10433 protein					3.25422			3.75313
7243023	NUFP2	KIAA1321 protein					3.15323			3.60591
54792780	DDHD2	DDHD domain containing 2					3.12949			3.57215
7019933	Q9NXS9	unnamed protein product					3.08263			3.50644
5817221	Q9UFX5	hypothetical protein						3.77788		3.49685
4405795	DDX58	RNA helicase					3.07552			3.49657
55665950	TR150	thyroid hormone receptor associated protein 3					2.87157			3.22512
13559033	LSM14B	C20orf40, SCD6 homolog B (S. cerevisiae)					2.82756			3.16937
49257476	B4DUT1	SMYD family member 5					2.82633			3.16782
39652628	F120A	hypothetical protein LOC23196						3.45814		3.14825
48145949	UB2D3	UBE2D3					2.62601			2.92609
30846	DMD	unnamed protein product							3.82525	2.92489
4884200	Q9UG85	hypothetical protein						3.13538		2.8316
23958561	F1T0J8	REST corepressor 2					2.46699			2.74741
11527773	OAS3	2'-5' oligoadenylate synthetase 3							3.48305	2.66113
7770157	Q9P186	PRO2014					2.34549			2.61828
47132587	PRDBP	protein kinase C, delta binding protein					2.04296			2.32249
8744934	XIAP	baculoviral IAP repeat-containing 4					2.02153			2.30285
262476	CGL	cystathionine gamma-lyase; cystathionase					2.0126			2.29473
7542837	ACADM	medium-chain acyl-CoA dehydrogenase						2.47898		2.28246
4103448	IDH3B	NAD+-specific isocitrate dehydrogenase beta subunit isoform B						2.17886		2.0682
55665426	B1AKJ5	nardilysin (N-arginine dibasic convertase)							2.51918	2.03921
12804861	SMAD1	SMAD, mothers against DPP homolog 1 (Drosophila)							2.2637	1.90028
17391372	Q8WV80	MTAP protein							2.01809	1.77566
a Protein is included if at least half of the biologic z-score values are ≥1.960σ (indicated by red bolding) at any time point and there are no major disagreements between biological replicates of the same time point.
b L/H ratio refers to the geometric mean of all log2 L/H values for each given gi number, expressed as relative protein quantity in infected cultures.
