# Supplementary material for: Quantification of the Host Response Proteome after Mammalian Reovirus T1L Infection
Source: PLoS One. 2012 Dec 11;7(12):e51939. doi: 10.1371/journal.pone.0051939 (PMC3519901; doi:10.1371/journal.pone.0051939)
Supplement: Table S2 — Table showing all host proteins observed as down-regulated (at 95% confidence) after infection with T1L reovirus for both 6 and 24 hpi. Proteins at the top of the lists are those identified more than one time; proteins in the bottom half are those identified only once. Table shows the individual protein z-scores found for each of the three biological replicates, as well as the average L:H ratios for all three experiments. A protein is included in this table if at least half of the biologic z-score values are ≥1.960σ (indicated by bolding; at least 95% confidence score) and there are no major disagreements between biological replicates. (XLS) [file pone.0051939.s004.xls]

## Sheet: Supplementary Table S2
Supplementary Table S2. HEK293 proteins decreased >95% confidencea
Accession	HGNC	Name	6 hpi				24hpi
			z-score			L:H ratiob	z-score			L:H ratiob
			Expt 1	Expt 2	Expt 3		Expt 1	Expt 2	Expt 3
Proteins measured in >1 experiment (at a single time point)
35700	PRPS2	unnamed protein product		-2.32855		0.497816	0.45396	-2.01583		0.80332
7239177	SHPK	CARKL	-0.317879	-4.11442		0.508394	0.101365			1.07606
6063691	VDAC1	porin isoform 1	-2.90627	-0.811817	-2.88487	0.571388		0.363876		1.13947
16307253	SNP29	Synaptosomal-associated protein, 29kDa	-1.68727	-2.1375	-2.29602	0.586864	-0.531703		-1.06882	0.796173
9295343	MRRP1	HNYA		-2.67162	-0.896281	0.614527			0.910186	1.30761
13112017	Q9BTT9	GYS1 protein	-0.246446	-2.93524		0.619075	-0.407699			0.879498
45501009	Q6NWZ1	CKAP4 protein		-2.04295	-1.80611	0.621943		-0.401178	-0.289532	0.912183
13938553	KAD6	TAF9 RNA polymerase II, TATA box binding protein (TBP)-associated factor, 32kDa	-0.836152	-2.2502		0.628262	-0.601869	0.0325286		0.912287
30354279	AKTS1	AKT1S1 protein	-1.0325	-2.04589		0.628991	-0.027773	0.041198		1.02364
4885579	RCD1	RCD1 required for cell differentiation1 homolog	-1.45724			0.635757	-0.330617		-2.31334	0.697712
55959177	VPS45	vacuolar protein sorting 45A (yeast)	-0.891856	-2.1129		0.636371	-0.32555			0.908598
577315	AMPM1	KIAA0094	-2.23368		-0.925388	0.646615	-0.075048			1.00341
48145521	RNF14	RNF14	0.0400018	-2.3569		0.709484
48146107	VAMP8	VAMP5		-0.533164	-2.82569	0.715585	1.2235			1.67856
7741063	NUDT4	diphosphoinositol polyphosphate phosphohydrolase type 2 beta	0.0383222	-2.012		0.748885	-0.270586			0.928603
6537210	PPP6	serine/threonine protein phosphatase catalytic subunit	0.668298	-2.63705		0.74969	-0.287244	-0.563851		0.880377
55957551	Q5TB52	3'-phosphoadenosine 5'-phosphosulfate synthase 2	-0.39096		-2.37694	0.752949	0.232895		-1.4132	0.883371
57997480	BAG6	hypothetical protein		-0.370993	-2.50381	0.75704	-0.420409			0.87508
31542862	GRWD1	glutamate-rich WD repeat containing 1	-0.884786			0.761772	-0.728585	-2.2255		0.614025
50949588	LS14A	hypothetical protein	0.338552		-3.1522	0.784532	-0.124608	-0.262673	-1.59265	0.842413
14041989	UBP47	unnamed protein product	-2.23348	0.568333		0.78532	-0.799015			0.753175
51258951	XPO6	XPO6 protein	0.471371	-2.07067		0.794524
5542014	DKC1	dyskerin	0.676112	-2.22298		0.80119	-0.0579631			1.01023
27769298	TRI25	Tripartite motif-containing 25	-0.238827		-1.96455	0.802282	-0.0863801	-0.755492	4.59858	1.41844
51476912	Q68D08	hypothetical protein	-0.694059			0.809078	-0.0559123	-2.42801		0.678612
47605963	ROCK2	Rho-associated protein kinase 2 (Rho-associated, coiled-coil-containing protein kinase 2) (p164 ROCK-2) (Rho kinase 2)	-0.688307			0.810549	-0.129866	-2.43833		0.667609
36122	RPB2	RNA polymerase II 140 kDa subunit	-0.592351			0.835494	-0.582654	-2.30653		0.623682
27503838	TPPC5	Trafficking protein particle complex 5	-1.57768	0.448344		0.854722	-0.256011	-3.14134		0.580136
15559560	BGLR	Glucuronidase, beta	-0.470091			0.868393	0.0180899	-2.459		0.685139
56203612	ARFG3	OTTHUMP00000028526	-0.427762			0.880082	-0.0827942	-2.22919		0.69741
50415798	Q6DC98	LMNB1 protein		-0.482969		0.890227	-1.40961	-2.35612		0.525138
14124914	GLYC	Serine hydroxymethyltransferase 1 (soluble)	-0.347061			0.902806	-0.0203517		-1.98741	0.7761
4503141	CTSC	cathepsin C isoform a preproprotein	0.150295	-0.785496	-0.0431936	0.947502	0.44879	-2.33589		0.761408
56204970	A8YXX4	glutamate-ammonia ligase (glutamine synthase)	-0.139872			0.96387	-0.0952418	-8.21962		0.260124
47496673	Q6ICN0	GRB2	0.0869824	0.35457		1.09546	0.69324	-2.96607		0.720619
55958754	PHP14	RP11-216L13.10	0.534151			1.19258	0.301213	-5.51825		0.438484
55960176	LAMC1	laminin, gamma 1 (formerly LAMB2)	0.193365	2.40143	-1.43524	1.21705	-2.45033	-2.41323		0.423307
5679449		OTTHUMP00000016179					-2.21257	0.235964		0.685571
34535789	Q6ZR81	unnamed protein product					0.14308	-2.3509		0.714896
Proteins measured in only one experiment (at a single time point)
4507525	SEC62	translocation protein 1		-4.96702		0.216864		-0.281075		0.921954
32967619	RM21	MRPL21 protein		-4.80818		0.227989
57165424	CUL4A	cullin 4A isoform 1	-3.73805			0.309307	0.234184			1.13421
55663525	MINP1	multiple inositol polyphosphate histidine phosphatase, 1	-3.46978			0.336661	-0.780207			0.758809
49065378	ZFAN6	AWP1	-3.45447			0.338293		-0.574653		0.837208
14714481	CD027	Chromosome 4 open reading frame 27	-3.32659			0.352238	-1.13166			0.660166
51105877	FKBP9	FK506 binding protein 9, 63 kDa	-3.09012			0.379558	-3.27665	1.28056		0.659169
55665395	XPO4	exportin 4	-3.07042			0.381928	0.646957			1.33575
54696458	CY1	cytochrome c-1		-3.07071		0.394056		1.6841		1.75801
37674431	PTPN12	protein tyrosine phosphatase, non-receptor type 12	-2.96171			0.395271	-3.17806			0.293427
4583149	CASP8	caspase 8	-2.85675			0.408596
22761477	NUDT9	unnamed protein product		-2.94716		0.409691		0.225405		1.08881
8489095	TR10B	Fas-like protein precusor	-2.79957			0.416044	-1.72222			0.522428
6102939	KCMF1	hypothetical protein	-2.79119			0.417146	-0.485553			0.852781
56377671	Q5R2V8	chromosome 2 open reading frame 4 short form	-2.73766			0.42426
56208564	NDK7	non-metastatic cells 7, protein expressed in (nucleoside-diphosphate kinase)	-2.6293			0.439034
55665275	TMCO1	putative membrane protein (LOC54499)	-2.57962			0.445977
51479141	ATP5J	ATP synthase, H+ transporting, mitochondrial F0 complex, subunit F6 isoform b precursor		-2.54911		0.464409		0.0713952		1.03511
57208605	B1AL37	Rac/Cdc42 guanine nucleotide exchange factor (GEF) 6	-2.4352			0.466795
55957523	TRM1L	chromosome 1 open reading frame 25	-2.43105			0.467406	-0.724555			0.775727
45827731	SCRIB	scribble isoform a		-2.49784		0.47197
54696162	STX5	syntaxin 5A	-2.3742			0.475877
37182260	CWC27	SDCCAG10	-2.30929			0.485734
44889481	MYO1B	myosin IB	-2.29409			0.488072
1800303	TCPH	HIV-1 Nef interacting protein	-2.28374			0.489672
12698037	TMCO7	KIAA1746 protein	-2.26002			0.493353
20380411	OTUD5	OTUD5 protein	-2.22247			0.49924
5902128	STXBP2	syntaxin binding protein 2	-2.2066			0.501749
5138924	FKBP7	FK506-binding protein	-2.18937			0.504488	1.59846			1.94744
7108333	APAF	apoptotic protease activating factor isoform a	-2.17489			0.5068
40555890	NOB1	NIN1/RPN12 binding protein 1 homolog (S. cerevisiae)	-2.16109			0.509014
31657111	LTN1	listerin E3 ubiquitin protein ligase 1	-2.14351			0.51185	-0.685567			0.787804
4589594	NISCH	KIAA0975 protein	-2.108			0.517623	-1.29208			0.619509
54696984	SNW1	SKI-interacting protein	-2.0908			0.520443	-0.102315			0.992629
4505779	PHKA1	phosphorylase kinase, alpha 1 (muscle)	-2.07036			0.523814	-0.774319			0.760581
12804933	T2AG	General transcription factor IIA, 2, 12kDa	-2.0525			0.526779	-2.08386			0.452683
6005990	ARSA	arylsulfatase A precursor	-2.00307			0.535069	-1.53159			0.563419
54673708	Q5U5Z3	Paraneoplastic antigen MA2	-2.00157			0.535322	-1.36955			0.60078
6468766	LCAP	oxytocinase/insulin-responsive aminopeptidase, variant 1		-2.08679		0.537199
54611158	DHX30	DEAH (Asp-Glu-Ala-His) box polypeptide 30		-2.06464		0.540961		-0.23611		0.93567
31563330	AKP13	A-kinase anchor protein 13 isoform 1		-2.04542		0.544245
37693452	LS14A	alphaSNBP(A)		-2.00652		0.550954
55958562	PTK7	PTK7 protein tyrosine kinase 7	-1.68755			0.591146	-2.71516			0.352499
37589006	TMED9	Transmembrane emp24 protein transport domain containing 9			-2.75244	0.592614
45827739	A6NIQ6	vitamin K epoxide reductase complex, subunit 1 isoform 2			-2.6666	0.602422
2352904	DNJA2	Dnj3/Cpr3			-2.16131	0.663543	0.42249			1.22207
4557701	K1C17	keratin 17			-1.96009	0.689574		0.682434	-0.937304	0.996594
16741721	PLOD1	Procollagen-lysine 1, 2-oxoglutarate 5-dioxygenase 1	-1.13318			0.704285	-2.43634			0.393675
56204070	LRC41	MUF1 protein (MUF1)	-1.2199	-1.10817		0.707815	-2.26007			0.422154
531122	ARBK1	beta-adrenergic receptor kinase	-0.81712			0.77823		-3.88726		0.282048
57012964	SMRC1	SWI/SNF-related matrix-associated actin-dependent regulator of chromatin subfamily C member 1 (SWI/SNF complex 155 kDa subunit) (BRG1-associated factor 155)	-1.0506		-0.171304	0.83775	-2.07454			0.454358
33150554	ARPC5L	actin related protein 2/3 complex, subunit 5-like			-0.876702	0.848328	-2.14855			0.441227
34594664	GPSM1	G-protein signalling modulator 1 (AGS3-like, C. elegans)	-0.469335			0.8686		-2.10101		0.507123
55660889	CHK2	OTTHUMP00000028871	-0.270022			0.925046	-2.09082			0.451436
22713625	PLOD2	Procollagen-lysine, 2-oxoglutarate 5-dioxygenase 2	-1.98286	1.67235		0.972165	-2.3696			0.404224
54673572	ARP5L	Hypothetical protein LOC90624			-0.0281402	0.997797		-2.37539		0.463421
20563689	Q8NHZ6	mannose phosphate isomerase isoform		-0.013612		1.03204		-2.98833		0.378919
6969579	GLSK	glutaminase kidney isoform		0.20174		1.10447			-2.26357	0.544279
520587	KPCD	protein kinase C delta-type		1.00918		1.42427	-1.99623			0.468678
56206367	GPAN1	HLA-B associated transcript 4						-9.26926		0.0481545
55665386	SRRM1	serine\/arginine repetitive matrix 1					-6.19537			0.0887703
7023178	INT9	unnamed protein product					-4.19488			0.196119
40548403	DCP1B	decapping enzyme Dcp1b					-3.8717			0.222912
5911846	TSYL1	TSPYL					-3.73938			0.234912
7022048	NOB1	unnamed protein product					-2.9419			0.32221
20072832	KISHA	Hypothetical protein MGC23909					-2.8485			0.334359
4502131	APBB1	amyloid beta A4 precursor protein-binding, family B, member 1 isoform E9					-2.65708			0.360704
9187612	DUS3L	hypothetical protein, similar to (AF091072.1) predicted protein					-2.61745			0.366414
12052738	SMG9	hypothetical protein					-2.5273			0.379739
55958826	URM1	RP11-339B21.4					-2.37036			0.404103
40850975	ARMC9	Armadillo repeat containing 9					-2.20764			0.431017
5138916	CK054	PTD012					-2.16001			0.439228
51094708	BRAT1	chromosome 7 open reading frame 27					-2.0573			0.457473
14279233	BRE1A	RING finger protein 20					-1.97162			0.473269
18426915	DREB	drebrin 1 isoform a							-2.54535	0.503531
a Protein is included if at least half of the biologic z-score values are ≤ -1.960σ (indicated by blue bolding) at any time point and there are no major disagreements between biological replicates of the same time point.
b L/H ratio refers to the geometric mean of all log2 L/H values for each given gi number, expressed as relative protein quantity in infected cultures.
